# Supplementary material for: UC2 search: using unique connectivity of uncharged compounds for metabolite annotation by database searching in mass spectrometry-based metabolomics
Source: PubMed Central journal article supplement (PMC5860614; doi:10.1093/bioinformatics/btx649), 2017-10-12
Supplement: btx649_supplementarydata.pdf [file btx649_supplementarydata.pdf]

---

*Supplementary Material for*

# **UC2 search: Using unique connectivity of uncharged compounds for metabolite annotation by database searching in mass spectrometry-based metabolomics**

Nozomu Sakurai<sup>1,\*</sup>, Takafumi Narise<sup>1</sup>, Joon-Soo Sim<sup>2</sup>, Chang-Muk Lee<sup>2</sup>, Chiaki Ikeda<sup>1</sup>, Nayumi Akimoto<sup>1</sup> and Shigehiko Kanaya<sup>3</sup>

<sup>1</sup>Department of Technology Development, Kazusa DNA Research Institute, Kisarazu, Chiba 292-0818, Japan;

<sup>2</sup>Department of Agricultural Biotechnology, National Institute of Agricultural Sciences, 370 Nongsengmyung-Ro, Jeonju 54874, Korea; <sup>3</sup>Graduate School of Information Science, Nara Institute of Science and Technology, 8916-5 Takayama, Ikoma, Nara 630-0192, Japan

\*To whom correspondence should be addressed.

**Contact:** sakurai@kazusa.or.jp

---

## **1. Supplementary Results and Discussion**

### **1.1. Practical examples showing issues in conventional searches and solving them using UC2**

We describe here five examples that show the issues occurring in a search executed in the normal way (conventional search) and how to solve them by performing a search using the Unique Connectivity of Uncharged Compounds (UC2 search). For both searches, the MFSearcher graphical user interface (GUI) tool was used to obtain the search results and the same databases, namely, Kyoto Encyclopedia of Genes and Genomes (KEGG), KNApSACk, a flavonoid database (hereafter referred to as FlavonoidViewer, <http://metabolomics.jp/wiki/Category:FL>), HMDB and LIPID MAPS were selected as target databases. Metabolites were assumed to be detected using liquid chromatography (LC)–mass spectrometry (MS) with electrospray ionization (ESI), which is often used in untargeted metabolome analyses.

#### **1.1.1. False positives caused by entries registered as charged molecules in the databases**

Most of the compounds in compound databases are registered as neutral molecules, whereas in LC–MS analyses, mass values ( $m/z$  value) of metabolites are measured as charged form, namely ions.

Therefore, to search for compounds that match the  $m/z$  value, it is essential to estimate the adduct of the detected ion.  $[M]^+$ ,  $[M+H]^+$ ,  $[M+NH_4]^+$  and  $[M+Na]^+$  are often observed in the positive mode where cations are detected, and  $[M]^-$ ,  $[M-H]^-$  and  $[M+HCOO]^-$  are often observed in the negative mode where anions are detected. For example, when a peak is detected at an  $m/z$  value of 580.1575 in the positive mode, neutral compounds having mass values of 579.1502, 562.1237 or 557.1683 are searched for, which correspond to the estimated adduct ions  $[M+H]^+$ ,  $[M+NH_4]^+$  or  $[M+Na]^+$ , respectively. The detected mass value of 580.1575 is used to search the compounds that are registered as molecular ions ( $[M]^+$ ). Therefore, estimation of the type of adduct ion has a large effect on the search results.

The type of adduct of the detected peak can be estimated based on mass differences between the peaks that were eluted simultaneously, because the variations of the adducts occur during ionization, which takes place just after the LC separation and just before the MS detection (**Supplementary Fig. S1**). For example, if the mass difference between a pair of co-detected peaks is exactly 21.9820, the theoretical mass difference between sodium and hydrogen, this strongly suggests that the peak with the larger  $m/z$  value should be  $[M+Na]^+$  and the one of smaller  $m/z$  should be  $[M+H]^+$ . However, in practical LC–MS data, many peaks cannot be detected with co-detected peaks; therefore the adducts are not determined. In this case, we have to prioritise and choose some adduct ions from various possibilities considering the sample analysed and the chromatography conditions. Typically, a protonated ion  $[M+H]^+$  or a deprotonated ion  $[M-H]^-$  as ions ideally ionised without salts in the eluents are prioritised in the positive or negative mode, respectively.

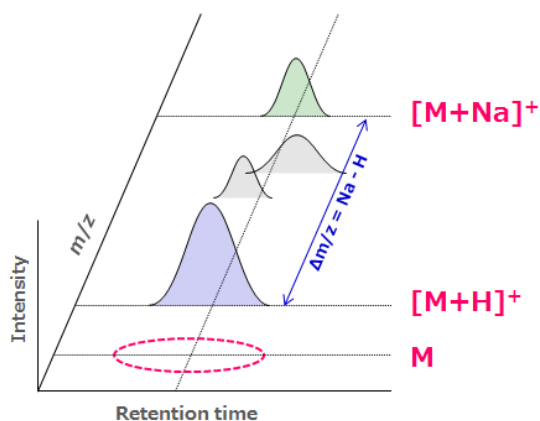

**Supplementary Fig. S1. Determination of adduct ions.**

When no co-detected peaks can be identified, we cannot judge whether the peak is detected as a molecular ion such as  $[M]^+$  or a typical adduct ion such as  $[M+H]^+$ . Some metabolites can be charged themselves and detected as molecular ions,  $[M]^+$  or  $[M]^-$ . Typical examples of molecular

ions are anthocyanins as pigment compounds in plants and quaternary ammonium compounds such as phosphatidylcholines. These compounds are usually registered as charged molecules in compound databases. As we show in **Supplementary Table S1**, a remarkable number (1.2–7.2%) of compounds in the databases are registered as charged molecules. Therefore, when no co-detected peaks can be identified, the abovementioned  $m/z$  value of 580.1575 should be searched as both a molecular ion ( $[M]^+$ ) and a typical adduct ion ( $[M+H]^+$ ). Searching for only one of them will be the cause of false negatives.

Here we show examples of issues caused by these two cycles of searching. An  $m/z$  value of 580.1575, detected in the positive mode by Iijima *et al.* (2008), was searched using the MFSearcher GUI tool assuming both  $[M]^+$  and  $[M+H]^+$ . KEGG, KNApSACk, HMDB, FlavonoidViewer and LIPID MAPS were used as the target databases. A 5 ppm mass tolerance was allowed. Twenty-nine candidates were found when a search was made for 580.1575 assuming  $[M]^+$ . When the neutralized mass value of 579.1503 for  $[M+H]^+$  was searched, four candidates were found. Next, we checked the appropriateness of these candidates by considering their charges. The 29 candidates found when a search was made assuming  $[M]^+$  have to be registered as  $[M]^+$  in the databases too. We checked the structure of these candidates at the websites of the original compound databases and found that all 29 candidates were registered as neutral molecules. Therefore, these candidates were all false positives. Similarly, the four candidates found assuming  $[M+H]^+$  were checked and they were also found to be false positives registered as  $[M]^+$  (**Supplementary Fig. S2**).

MFSearcher GUI - 1.5.4

adduct: [M]<sup>+</sup>     EX-HR2     Pep1000    Search

mass: 580.1575     KNApSack     KEGG     UNPD

margin: 5     ppm     m/z     PubChem     HMDB    menu

Mode:  Conv.     UC2

| DB Name  | Formula   | FW (adduct) | Delta ppm | Compound ID | Compound N...       |
|----------|-----------|-------------|-----------|-------------|---------------------|
| KEGG     | C30H28O12 | 580.158     | -0.048    | C17772      | Gambirinin A1       |
| KEGG     | C30H28O12 | 580.158     | -0.048    | C17773      | Gambirinin A2       |
| KEGG     | C30H28O12 | 580.158     | -0.048    | C17774      | Gambirinin A3       |
| KNApSack | C30H28O12 | 580.158     | -0.048    | C00007879   | Chalconaring...     |
| KNApSack | C30H28O12 | 580.158     | -0.048    | C00008211   | Prunin 6"-p-c...    |
| KNApSack | C30H28O12 | 580.158     | -0.048    | C00008212   | Prunin 3"-p-c...    |
| KNApSack | C30H28O12 | 580.158     | -0.048    | C00008928   | Gambirinin A1       |
| KNApSack | C30H28O12 | 580.158     | -0.048    | C00008929   | Gambirinin A3       |
| KNApSack | C30H28O12 | 580.158     | -0.048    | C00014318   | Naringenin 7-...    |
| KNApSack | C30H28O12 | 580.158     | -0.048    | C00014410   | Taxifolin 3-(3-...  |
| KNApSack | C30H28O12 | 580.158     | -0.048    | C00014499   | 4,2',3',4'-Tetra... |
| KNApSack | C30H28O12 | 580.158     | -0.048    | C00014500   | 4,2',3',4'-Tetra... |

Name: \_\_\_\_\_    Link

Status: 29 found.

MFSearcher GUI - 1.5.4

adduct: [M+H]<sup>+</sup>     EX-HR2     Pep1000    Search

mass: 580.1575     KNApSack     KEGG     UNPD

margin: 5.0     ppm     m/z     PubChem     HMDB    menu

Mode:  Conv.     UC2

| DB Name   | Formula   | FW (adduct) | Delta ppm | Compound ID  | Compound N...    |
|-----------|-----------|-------------|-----------|--------------|------------------|
| KEGG      | C30H27O12 | 580.158     | -0.048    | C16368       | Pelargonidin ... |
| KNApSack  | C30H27O12 | 580.158     | -0.048    | C00006756    | Pelargonidin ... |
| LipidMAPS | C30H27O12 | 580.158     | -0.048    | LMPK12010031 | Pelargonidin ... |
| FlavView  | C30H27O12 | 580.158     | -0.048    | FL7AAAGL0017 | Pelargonidin ... |

Name: Pelargonidin 3-(6-p-coumaroyl)glucoside    Link

Status: 4 found.

Supplementary Fig. S2. Two cycles of database searching and checking the records in a conventional search.

Using UC2, the false positives in the conventional search are eliminated. With UC2, charged compounds in the original databases are tentatively neutralized by adding or removing hydrogens to or from the formulae and the tentatively neutralized mass values are registered. Hydrogen is selected for adjustment of the neutralized mass, because in most cases,  $[M+H]^+$  or  $[M-H]^-$  are typical default adduct ions when no clues are obtained to estimate the true adduct ions.

When the detected mass, 580.1575, is searched as  $[M+H]^+$  using UC2, compounds that have a neutralized mass value of 579.1502 are searched. Indeed, the correct result — in this case, no candidate — was obtained in the UC2 search with the same target databases (KEGG, KNApSAcK, LIPID MAPS, HMDB and FlavonoidViewer) as used in the conventional search (**Supplementary Fig. S3**).

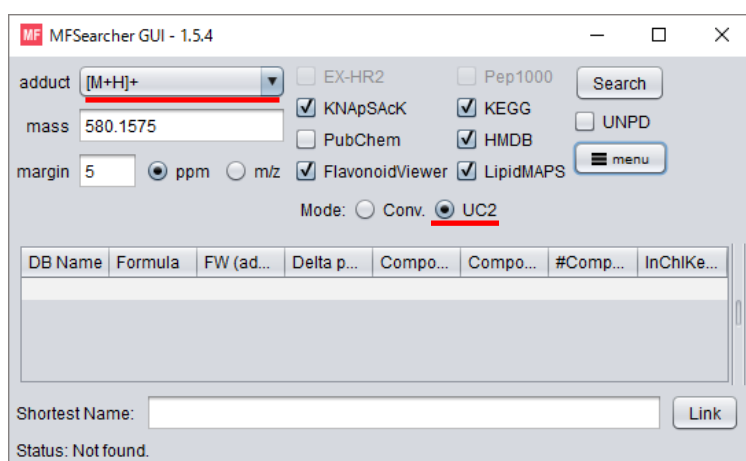

**Supplementary Fig. S3. An example of UC2 search results.** The false positives observed in the conventional search (**Supplementary Fig. S2**) were excluded.

In the next example, appropriate candidates are found. When a mass value of 859.21374 was applied in a conventional search, 12 candidates for  $[M]^+$  and one candidate for  $[M+H]^+$  were found. All these were found to have appropriate charges upon checking on the database websites. When the mass value was applied in a single UC2 search with  $[M+H]^+$ , the same 13 candidate compounds were found in five results consisting of the constitutional isomers (**Supplementary Fig. S4**, see **Supplementary Results and Discussion 1.1.3** for the details of the compiled results).

The screenshot shows the MFSearcher GUI with the following search parameters: adduct [M+H]<sup>+</sup>, mass 859.21374, margin 5.0 ppm, and Mode UC2. The search results table is as follows:

| DB ... | Formula   | FW (a...) | Adduct             | Delta ... | Compo...   | Compoun...    | #Co... | InChI... |
|--------|-----------|-----------|--------------------|-----------|------------|---------------|--------|----------|
| UC2    | C36H43O24 | 859.214   | [M] <sup>+</sup>   | -0.161    | KN:[1]C... | Cyanidin ...  | 2      | QGC...   |
| UC2    | C36H43O24 | 859.214   | [M] <sup>+</sup>   | -0.161    | KN:[1]C... | Cyanidin ...  | 3      | XXFR...  |
| UC2    | C36H43O24 | 859.214   | [M] <sup>+</sup>   | -0.161    | KN:[1]C... | Delphinidi... | 3      | WFT...   |
| UC2    | C36H43O24 | 859.214   | [M] <sup>+</sup>   | -0.161    | KN:[1]C... | Cyanidin ...  | 4      | ASC...   |
| UC2    | C36H42O24 | 859.214   | [M+H] <sup>+</sup> | -0.161    | KN:C00...  | Kaempfer...   | 1      | RBO...   |

The detailed view on the right shows the top result from the KNApS... database with ID C00014... and character 1. The shortest name is Cyanidin 7-(3-glucosyl-6-malonylglucoside)-4'-glucoside.

**Supplementary Fig. S4. An example of UC2 search results.** Candidates with appropriate charges are correctly obtained.

The elimination of apparent false positives with mismatching charge is a practical advantage of UC2, because researchers have to check the appropriateness of the candidates in a conventional search by checking the original databases one by one, as shown in these examples. Small numbers of candidates (30 and 13) are found here, but in practical data, more than 100 candidates will often be hit per query, as shown in **Supplementary Figs S12–14**. Many isomers are known in compound groups such as lipids and flavonoids (**Supplementary Table S1**, note the low proportion of unique formulae) and this would increase the number of candidates. Therefore, checking all candidates found in a conventional search with thousands of peaks detected in each LC–MS run is not practical. Using UC2 solves this issue. Among the databases used here, a search function that takes into account a match of charge is only provided by the LIPID MAPS website. KEGG and FlavonoidViewer do not even provide a web user interface to search compounds by mass values. Therefore, the unique cross-database search function using UC2 implemented in the MFSearcher web service and MFSearcher GUI tool should contribute to a better annotation of metabolites detected in untargeted metabolome analyses using LC–MS.

### 1.1.2. False positives caused by compounds registered as multiple components

When the  $m/z$  value of 939.2384, detected in the negative mode (Iijima *et al.*, 2008), was searched as [M] in the conventional search, the compound Novaeguinoside B (C<sub>36</sub>H<sub>56</sub>NO<sub>17</sub>S<sub>3</sub>Na<sub>3</sub>) was found in LIPID MAPS as a candidate. However, this is a false positive because the structure

excluding the sodium ions should be much smaller; e.g. 916.2511 as  $[C_{36}H_{56}NO_{17}S_3+Na_2]^+$ , 872.2872 as  $[C_{36}H_{56}NO_{17}S_3+H_2]^+$  and 290.0908 as  $[C_{36}H_{56}NO_{17}S_3]^{3-}$ . Researchers have to check if the candidate is a salt or not by referring to the structural information such as provided on the original web page of the database. When the mass value was applied in a UC2 search with  $[M-H]^-$ , a correct result (no candidate) was obtained.

One advantage of the UC2 search is that both salt and non-salt entries are obtained in a compiled result. When another  $m/z$  value, 346.0558 detected in negative mode (Iijima *et al.*, 2008), was applied in a UC2 search with  $[M-H]^-$ , six results with the formula  $C_{10}H_{14}N_5O_7P_1$  were found (Supplementary Fig. S5). One of the results, 'Adenosine monophosphate', included two KEGG entries (C00020 and C18344); the latter is a di-sodium salt of the former.

MFSearcher GUI - 1.5.4

adduct:  $[M-H]^-$      EX-HR2     Pep1000    Search

mass: 346.0558     KNApSack     KEGG     UNPD

margin: 5.0     ppm     m/z     PubChem     HMDB     LipidMAPS    menu

Mode:  Conv.     UC2

| DB ... | Formula      | FW (a... | Add...    | Delta ... | Comp... | Compound...   | #C... | In... | DB       | ID        | Char. |
|--------|--------------|----------|-----------|-----------|---------|---------------|-------|-------|----------|-----------|-------|
| UC2    | C10H14N5O7P1 | 346.056  | $[M-H]^-$ | -0.027    | KG:C... | dGMP;Deo...   | 3     | LT... | KEGG     | C00020    |       |
| UC2    | C10H14N5O7P1 | 346.056  | $[M-H]^-$ | -0.027    | KG:C... | 7-alpha-D...  | 1     | NV... | KEGG     | C18344    | -2f   |
| UC2    | C10H14N5O7P1 | 346.056  | $[M-H]^-$ | -0.027    | KG:C... | Adenosine ... | 4     | U...  | KNApS... | C00019... |       |
| UC2    | C10H14N5O7P1 | 346.056  | $[M-H]^-$ | -0.027    | KG:C... | 3'-AMP        | 3     | LN... | HMDB     | HMDB0...  |       |
| UC2    | C10H14N5O7P1 | 346.056  | $[M-H]^-$ | -0.027    | KG:C... | 2-Hydroxy-... | 2     | GE... |          |           |       |
| UC2    | C10H14N5O7P1 | 346.056  | $[M-H]^-$ | -0.027    | KG:C... | 2'-AMP        | 3     | Q...  |          |           |       |

Shortest Name: Adenosine monophosphate    Link

Status: 6 found.

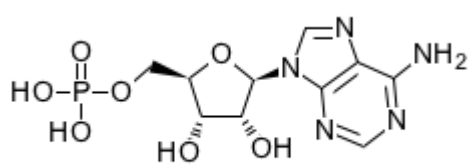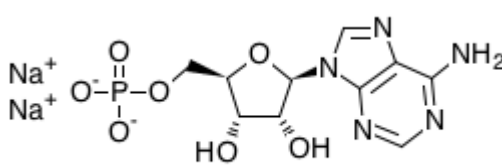

**Supplementary Fig. S5. An example of UC2 search results.** A component in the salt is correctly found.

It is an advantage of the UC2 search that the compounds registered only as salts among databases can be searched (Supplementary Fig. S6).

MFSearcher GUI - 1.5.4

adduct: [M-H]-

mass: 293.1792

margin: 5.0 (ppm)

Mode: UC2

| DB ... | Formula    | FW (a... | Add... | Delta ... | Comp...   | Compound...   | #C... | In... |
|--------|------------|----------|--------|-----------|-----------|---------------|-------|-------|
| UC2    | C14H29O4S1 | 293.179  | [M]-   | -0.014    | HM:[-1... | Sodium Tet... | 1     | U...  |

Shortest Name: Sodium Tetradecyl Sulfate

Status: 1 found.

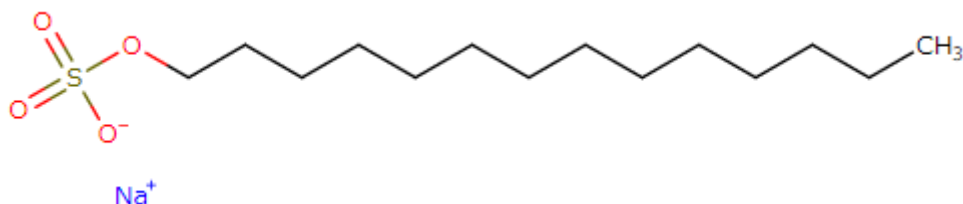

**Supplementary Fig. S6. An example of UC2 search results.** A compound registered only as salt is found.

### 1.1.3. Complexity of the search results caused by the existence of isomers

Here we exemplify a further advantage of UC2, namely that records with the same atomic connectivity are compiled in a single result. In a conventional search, 12 candidates including glutamine were obtained when the  $m/z$  value of 147.0764, detected in the positive mode (Iijima *et al.*, 2008), was searched as  $[M+H]^+$  (**Supplementary Fig. S7**, upper panel). Judging from the compound names, the results seemed to contain stereoisomers of glutamine and other isomers such as 3-ureidoisobutyrate. Users have to rearrange the results to obtain the information they want. A typical interest of untargeted metabolome researchers is firstly the constitutional isomers and then the stereoisomers.

When the mass value was applied in a UC2 search, for the same formula ( $C_5H_{10}N_2O_3$ ), four compiled results — representing four constitutional isomers — were obtained (**Supplementary Fig. S7**, lower panel). The shortest name among the compiled entries are displayed as a representative at the ‘Shortest Name’ field. In the result for ‘L-Glutamine’, three KEGG entries were found: L-Glutamine, D-Glutamine and a glutamine without stereochemistry information. L- and D-Glutamine were registered in HMDB and only L-Glutamine was registered in



## KNApSack.

MFSearcher GUI - 1.5.4

adduct: [M+H]<sup>+</sup>     EX-HR2     Pep1000   

mass: 147.0764     KNApSack     KEGG     UNPD

margin: 5.0     ppm     m/z     PubChem     HMDB   

FlavonoidViewer     LipidMAPS

Mode:  Conv.     UC2

| DB Name  | Formula   | FW (adduct) | Adduct             | Delta ppm | Compound ID | Compound Name         |
|----------|-----------|-------------|--------------------|-----------|-------------|-----------------------|
| KEGG     | C5H10N2O3 | 147.076     | [M+H] <sup>+</sup> | -0.127    | C00064      | L-Glutamine;L-2-A...  |
| KEGG     | C5H10N2O3 | 147.076     | [M+H] <sup>+</sup> | -0.127    | C00303      | Glutamine;2-Amin...   |
| KEGG     | C5H10N2O3 | 147.076     | [M+H] <sup>+</sup> | -0.127    | C00819      | D-Glutamine;D-2...    |
| KEGG     | C5H10N2O3 | 147.076     | [M+H] <sup>+</sup> | -0.127    | C05100      | 3-Ureidoisobutyrate   |
| KEGG     | C5H10N2O3 | 147.076     | [M+H] <sup>+</sup> | -0.127    | C16673      | Isoglutamine;4,5...   |
| KEGG     | C5H10N2O3 | 147.076     | [M+H] <sup>+</sup> | -0.127    | C21029      | (R)-3-Ureidoisobu...  |
| KNApSack | C5H10N2O3 | 147.076     | [M+H] <sup>+</sup> | -0.127    | C00001359   | L-Glutamine           |
| HMDB     | C5H10N2O3 | 147.076     | [M+H] <sup>+</sup> | -0.127    | HMDB00641   | L-Glutamine           |
| HMDB     | C5H10N2O3 | 147.076     | [M+H] <sup>+</sup> | -0.127    | HMDB02031   | Ureidoisobutyric a... |
| HMDB     | C5H10N2O3 | 147.076     | [M+H] <sup>+</sup> | -0.127    | HMDB03423   | D-Glutamine           |
| HMDB     | C5H10N2O3 | 147.076     | [M+H] <sup>+</sup> | -0.127    | HMDB06899   | Alanylglycine         |
| HMDB     | C5H10N2O3 | 147.076     | [M+H] <sup>+</sup> | -0.127    | HMDB28687   | Alanyl-Glycine        |

Name:    

Status: 12 found.

MFSearcher GUI - 1.5.4

adduct: [M+H]<sup>+</sup>     EX-HR2     Pep1000   

mass: 147.0764     KNApSack     KEGG     UNPD

margin: 5.0     ppm     m/z     PubChem     HMDB   

FlavonoidViewer     LipidMAPS

Mode:  Conv.     UC2

| DB... | Formula   | FW (a... | Adduct             | Delt... | Comp...  | Compound...   | #Co... | InC... |
|-------|-----------|----------|--------------------|---------|----------|---------------|--------|--------|
| UC2   | C5H10N2O3 | 147.076  | [M+H] <sup>+</sup> | -0.127  | KG:C0... | 3-Ureidois... | 3      | PH...  |
| UC2   | C5H10N2O3 | 147.076  | [M+H] <sup>+</sup> | -0.127  | HM:H...  | Alanylglycine | 2      | CXI... |
| UC2   | C5H10N2O3 | 147.076  | [M+H] <sup>+</sup> | -0.127  | KG:C1... | Isoglutami... | 1      | AEF... |
| UC2   | C5H10N2O3 | 147.076  | [M+H] <sup>+</sup> | -0.127  | KG:C0... | L-Glutamine   | 6      | ZDX... |

| DB       | ID        | Char. |
|----------|-----------|-------|
| KEGG     | C00064    |       |
| KEGG     | C00819    |       |
| KEGG     | C00303    |       |
| KNApS... | C00001... |       |
| HMDB     | HMDB0...  |       |
| HMDB     | HMDB0...  |       |

Shortest Name: L-Glutamine   

Status: 4 found.

**Supplementary Fig. S7. Difference between the results of a conventional search (upper panel) and a UC2 search (lower panel).** In the UC2 search results, the same constitutional isomers are compiled in a single result, and the stereoisomers are included in each result.

As shown in this example, compiling the constitutional isomers in the results of the UC2 search should be helpful for understanding the search results. In the example, all four constitutional isomers have chiral carbons. However, stereoisomers are registered in the compound databases only for glutamine and 3-ureidoisobutyrate. UC2 masks this incompleteness of database registration and provides constitutional isomers first.

### 1.1.4. Obtaining candidates for different dissociation forms by the UC2 search

When a mass value of 496.3398 was applied in a conventional search, two formulae ( $C_{24}H_{51}NO_7P$ , one entry each in KEGG and HMDB, and  $C_{28}H_{48}O_7$ , three entries in KEGG) were obtained as  $[M]^+$  and a single formula ( $C_{24}H_{50}NO_7P$ , five entries in LipidMAPS, one entry in HMDB) was found as  $[M+H]^+$ . When searched as  $[M+H]^+$  using UC2, four constitutional isomers ( $C_{24}H_{50}NO_7P$ ) were obtained, and the abovementioned candidate  $C_{28}H_{48}O_7$  was found as a false positive with mismatching charge. Among the four true positive candidates with  $C_{24}H_{50}NO_7P$ , one result including the KEGG entry C04102 was a kind of glycerophosphocholine, a quaternary ammonium compound. In KEGG, this compound is registered as its  $[M]^+$  form, while the compound is registered as the neutral form in LIPID MAPS and HMDB (**Supplementary Fig. S8**). As shown in this example, UC2 can provide the candidates registered in different dissociation forms in a single result.

The screenshot shows the MFSearcher GUI with the following search parameters: adduct [M+H]<sup>+</sup>, mass 496.3398, margin 5.0 ppm, and Mode UC2. The search results table is as follows:

| DB ... | Formula      | FW (a... | Adduct             | Delta... | Comp...   | Compound ...  | #Co... | InCh... |
|--------|--------------|----------|--------------------|----------|-----------|---------------|--------|---------|
| UC2    | C24H50N107P1 | 496.34   | [M+H] <sup>+</sup> | 0.066    | LM:LM...  | PC(O-14:0/... | 1      | HEA...  |
| UC2    | C24H50N107P1 | 496.34   | [M+H] <sup>+</sup> | 0.066    | LM:LM...  | PC(0:0/16:0)  | 2      | NEG...  |
| UC2    | C24H50N107P1 | 496.34   | [M+H] <sup>+</sup> | 0.066    | LM:LM...  | PE(19:0/0:0)  | 1      | GE...   |
| UC2    | C24H50N107P1 | 496.34   | [M+H] <sup>+</sup> | 0.066    | KG:[1]... | PC(16:0/0:0)  | 5      | ASW...  |

The shortest name is PC(16:0/0:0) and the status is 4 found.

#### KEGG

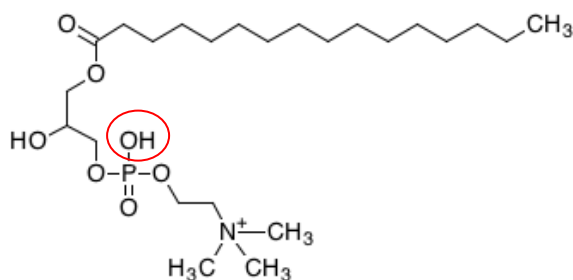

C04102

#### LIPID MAPS

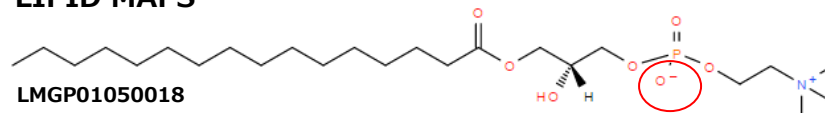

LMGP01050018

**Supplementary Fig. S8. An example of UC2 search results.** Candidates registered in different dissociation forms can be searched and compiled in one result.

### 1.1.5. Application of UC2 to hardly neutralizable charged compounds

When a mass value of 174.1489 was applied in a conventional search, six candidates including Muscarine and Butyrylcholine were found as  $[M]^+$  and two candidates, 9-Amino-nonanoic acid and 3R-Aminononanoic acid, were obtained as  $[M+H]^+$ . Judging by their charge, these eight candidates were true positives. When the mass value was searched by UC2 with  $[M+H]^+$ , four results including all these eight candidates were also obtained. Butyrylcholine seems hard to neutralize and a dehydrogenated form of this compound would not be expected. Nevertheless, the compound is correctly searched by UC2 where the positive and negative charges were forcedly neutralized by removing and adding equivalent numbers of hydrogens from and to the formula to adjust the mass differences between  $[M]^+$  and  $[M+H]^+$  (**Supplementary Fig. S9**). This result shows that UC2 is applicable to searches for hardly neutralizable compounds; the adjustment of the charge by tentatively adding or removing hydrogen atoms to or from the formula is a practical procedure.

MFSearcher GUI - 1.5.4

adduct:   EX-HR2  Pep1000   
mass:   KNApSack  KEGG  UNPD  
margin:   ppm  m/z  PubChem  HMDB   
 FlavonoidViewer  LipidMAPS  
Mode:  Conv.  UC2

| DB ... | Formula   | FW (a... | Adduct | Delta... | Comp...    | Compound Name    | #C... | In... |
|--------|-----------|----------|--------|----------|------------|------------------|-------|-------|
| UC2    | C9H20N1O2 | 174.149  | [M]+   | 0.257    | KG:[1]...  | Muscarine        | 4     | U...  |
| UC2    | C9H19N1O2 | 174.149  | [M+H]+ | 0.257    | LM:LM...   | 9-amino-nonan... | 1     | V...  |
| UC2    | C9H20N1O2 | 174.149  | [M]+   | 0.257    | LM:[1]L... | Butyrylcholine   | 2     | Y...  |
| UC2    | C9H19N1O2 | 174.149  | [M+H]+ | 0.257    | LM:LM...   | 3R-aminononan... | 1     | JS... |

Shortest Name:    
Status: 4 found.

#### LIPID MAPS

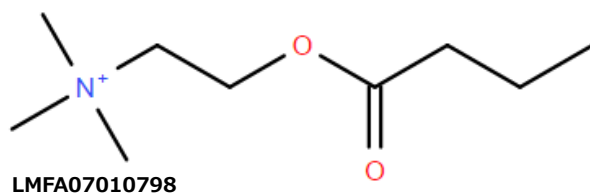

**Supplementary Fig. S9. An example of UC2 search results.** Compounds such as Butyrylcholine that are not expected to be neutralized in normal conditions can be searched correctly.

## 1.2. Example of the records of the UC2 database

In the UC2 database, the IDs of the compounds in each compound database are stored based on InChIKey skeletons (the first block in the hash of the IUPAC International Chemical Identifier). **Supplementary Fig. S10** is an example of the HMDB records stored in the MariaDB RDB system (MariaDB Foundation) in the MFSearcher web service. A tentatively neutralized mass value, a tentatively neutralized formula, IDs and the name of the compound are associated with an InChIKey skeleton. Multiple IDs can be assigned to the same InChIKey skeleton. The shortest name among the associated compounds is used as the representative. Signatures at the head of compound IDs represent the compound databases: KG, KEGG; KN, KNApSAcK; FL, FlavonoidViewer; HM, HMDB; LM, LIPID MAPS; UN: UNPD; and PC, PubChem. The number, 'f' and 'r' in the square brackets represent the charge, whether the compound is registered as multiple components and whether the compound is registered as radical. Complete data for HMDB and PubChem are available on the MFSearcher website (<http://webs2.kazusa.or.jp/mfsearcher/uc2/>).

| Tentatively Neutralized Mass | InChIKey skeleton | Tentatively Neutralized Formula | IDs                            | Shortest Name     |
|------------------------------|-------------------|---------------------------------|--------------------------------|-------------------|
| 2.01565006                   | UFHFLCQGNINRNP    | H2                              | HM:HMDB01362                   | Hydrogen          |
| 4.00260000                   | SWQJXJQGLNCGZEY   | He                              | HM:HMDB37238                   | Helium            |
| 16.03130013                  | VNWKTKOKETHGBQD   | CH4                             | HM:HMDB02714                   | Methane           |
| 17.02654910                  | QGZKDVFGQNNGYKY   | H3N                             | HM:HMDB00051, HM:[1]HMDB41827  | Ammonia           |
| 18.01056469                  | XLYOFNOQVPJUNP    | H2O                             | HM:[-1]HMDB01039, HM:HMDB02111 | Water             |
| 20.00622823                  | KRHYFGRYVWZRS     | HF                              | HM:[-1]HMDB00662               | Fluoride          |
| 26.98153900                  | XAGFODPZIPBFFR    | Al                              | HM:HMDB15456                   | Aluminium         |
| 27.01089904                  | LELOWRISYMNNSU    | CHN                             | HM:HMDB60292                   | Hydrogen cyanide  |
| 27.99491462                  | UGFAIRIUMAVXCW    | CO                              | HM:[r]HMDB01361                | Carbon monoxide   |
| 28.00614801                  | IJGRMHOSHDXDMSA   | N2                              | HM:HMDB01371                   | Nitrogen          |
| 28.03130013                  | VGGSQFUCUMXWEO    | C2H4                            | HM:HMDB29594                   | Ethylene          |
| 29.99798863                  | MWUXSHHQAYIFBG    | ON                              | HM:[r]HMDB03378                | Nitric oxide      |
| 30.01056469                  | WSFSSNUMVMOOMR    | CH2O                            | HM:HMDB01426                   | Formaldehyde      |
| 31.04219917                  | BAVYZALUXZFZLV    | CH5N                            | HM:HMDB00164, HM:HMDB60291     | Methylamine       |
| 31.98982924                  | MYMOFIZGZYHOMD    | O2                              | HM:HMDB01377                   | Oxygen            |
| 32.02621475                  | OKKJLVBELUTLKV    | CH4O                            | HM:HMDB01875                   | Methanol          |
| 32.03744814                  | OAKJQQAQXSQVMHS   | H4N2                            | HM:HMDB12973                   | Hydrazine         |
| 32.99765428                  | OUUQCZGPNVNCQIJ   | HO2                             | HM:[-1r]HMDB02168              | Superoxide        |
| 33.02146373                  | AVXURJPOCDRRFD    | H3ON                            | HM:HMDB03338                   | Hydroxylamine     |
| 33.02146373                  | GSWAOPJLTADLTN    | H3ON                            | HM:HMDB32439                   | Nitrogen oxides   |
| 33.98772106                  | UCKMPCXJQFINFW    | H2S                             | HM:[-2]HMDB00598               | Sulfide           |
| 33.98772106                  | RWSOTUBLDIXVET    | H2S                             | HM:HMDB03276                   | Hydrogen sulfide  |
| 33.99723810                  | XYFCBTGJUZFHI     | H3P                             | HM:HMDB34790                   | Phosphine         |
| 34.00547931                  | MHAJPDJQMAIY      | H2O2                            | HM:HMDB03125                   | Hydrogen peroxide |
| 35.97667813                  | VEXZGXHMUGYJMC    | HCl                             | HM:[-1]HMDB00492, HM:HMDB02306 | Chloride ion      |
| 39.96238400                  | XKRFYHLGVUSROY    | Ar                              | HM:HMDB37240                   | Argon             |
| 39.97995662                  | CPLXHLVBOLITMK    | OMg                             | HM:HMDB15458                   | Magnesium oxide   |
| 41.02654910                  | WEVYAHXRMPXWCK    | C2H3N                           | HM:HMDB61869                   | Acetonitrile      |
| 43.00581366                  | XLJMAIOERFSOGZ    | CHON                            | HM:[-1]HMDB02078               | Cyanate           |
| 43.98982924                  | CURLTUGMZLYLDI    | CO2                             | HM:HMDB01967                   | Carbon dioxide    |
| 44.00106264                  | GQPLMRYTRLFLPF    | ON2                             | HM:HMDB35807                   | Nitrous oxide     |
| 44.00695928                  | VGTPKLINSHNZRD    | HO2B                            | HM:HMDB34769                   | Boric acid (HBO2) |
| 44.02621475                  | IKHGUXGNUMITLKF   | C2H4O                           | HM:HMDB00990                   | Acetaldehyde      |
| 44.06260026                  | ATUOYWVHWRKTHZ    | C3H8                            | HM:HMDB31630                   | Propane           |
| 45.02146373                  | ZHNUHDYFZUAESO    | CH3ON                           | HM:HMDB01536                   | Formamide         |
| 45.05784923                  | QUSNBJAOOMFDIB    | C2H7N                           | HM:HMDB13231                   | Ethylamine        |
| 45.05784923                  | ROSDSFDQCJNGOL    | C2H7N                           | HM:HMDB00087                   | Dimethylamine     |
| 46.00547931                  | BDAGIHXXWWSANSR   | CH2O2                           | HM:HMDB00142                   | Formic acid       |

**Supplementary Fig. S10. An example of records in the UC2 database in the MFSearcher web service.** The head of the data in the table for HMDB is shown.

### 1.3. Features of the entries in the databases

The number of charged entries and unique connectivities differs very much between the compound databases; therefore, a query of multiple databases with the proper charge is needed to obtain the maximum number of appropriate candidate compounds. **Supplementary Table S1** shows a summary of the entries in the compound databases. A substantial number of compounds were stored as charged molecule in each database, especially in FlavonoidViewer (7.2%). As for the charged compounds in FlavonoidViewer, LIPID MAPS and KNApSACk, less than 2% were those whose uncharged counterparts with the same connectivity were also registered in the same database (**Supplementary Table S2**). This suggests that most charged compounds are registered only as their

charged form and are not registered redundantly as neutral form; therefore, multiple searches assuming the molecular ions such as  $[M]^+$  and  $[M]^-$  and adduct ions such as  $[M+H]^+$  and  $[M-H]^-$  are essential to obtain appropriate candidates from these databases (see **Supplementary Results and Discussion 1.1.4**). Relatively low ratios of the unique InChIKey skeletons were found in databases with a huge number of entries (UNPD and PubChem, 73% and 78%, respectively), implying that many entries with different constitutional isomers and stereoisomers are registered in them (**Supplementary Table S1**). Low ratios of unique formulae in FlavonoidViewer (15.2%), LIPID MAPS (18.3%), UNPD (14.2%) and PubChem (2.7%) suggest that many isomeric and/or fragmented compounds are included there (**Supplementary Table S1**). **Supplementary Table S3** shows the extent of the shared unique connectivity (InChIKey skeletons) between the databases. Large portions of unique InChIKey skeletons are shared between the largest databases (UNPD and PubChem). Most of the unique InChIKey skeletons in FlavonoidViewer are shared with LIPID MAPS and KNApSACk (95% and 100%, respectively), because the entries in FlavonoidViewer have been incorporated into LIPID MAPS and KNApSACk. On the other hand, in the other databases except these three (KEGG, LIPID MAPS, HMDB and KNApSACk), the proportion of shared unique InChIKey skeletons is less than 34%, suggesting that unique compounds are stored in these databases. Especially in HMDB, 37% are shared and hence 63% are unique even when compared with UNPD and PubChem. These results suggest that it is necessary for researchers to query multiple databases to cover the maximum number of compounds and also to remove the redundancy of the same compounds between databases.

## 2. Supplementary Methods

### 2.1. Details of the data acquired from the compound databases

The structural data of compounds were obtained from the compound database of the Kyoto Encyclopedia of Genes and Genomes (KEGG) (Kanehisa *et al.*, 2016), KNApSACk (Afendi *et al.*, 2012), a flavonoid database (hereafter referred to as FlavonoidViewer, <http://metabolomics.jp/wiki/Category:FL>), LIPID MAPS (Fahy *et al.*, 2009), Human Metabolome Database (HMDB) (Wishart *et al.*, 2013), UNPD (Gu *et al.*, 2013) and PubChem (Wang *et al.*, 2009) as MDL Mol files or SDF files. The download dates or the dataset versions are as follows: KEGG, downloaded on June 28th, 2017; KNApSACk, provided by Dr. Shigehiko Kanaya on March 17th, 2015; FlavonoidViewer, retrieved on August 20th, 2015; LIPID MAPS, the file LMSDFDownload6Dec16.zip was downloaded; HMDB, version 3.6 released on June 11th, 2017; UNPD, downloaded on August 20th, 2015 and PubChem, downloaded on June 27th 2017.

## 2.2. Construction of the UC2 database

The Chemistry Development Kit (CDK, version 2.0) (Willighagen *et al.*, 2017) and the Java Development Kit (JDK, version 1.7, Oracle Corporation) were used for molecular calculations and generation of the IUPAC International Chemical Identifier (InChI) and the hash of the InChI (InChIKey) (Heller *et al.*, 2013) as follows: Entries for which the registered formula did not match the formula calculated from the structure data were excluded because they were considered as misregistrations in the original databases. When multiple components were included in a record (hereafter referred to as fragmented records), the one with the largest molecular weight was used as a representative. After the implicit hydrogens were added, a Kekulé representation was assigned to the aromatic systems and the standard InChIKey and molecular formula were calculated. Entries to which implicit hydrogens could not be added were excluded. Compounds in PubChem with molecular weight larger than 5000 were excluded to reduce the calculation time. Isotopic compounds were excluded. The charge of the molecules was detected by summing the charges of the atoms. The tentatively neutralized formulae of the molecules were obtained by adding or removing hydrogens to or from the formula. Namely, an equivalent number of hydrogens was removed from the formulae for positively charged molecules, and an equivalent number of hydrogens was added to the formulae for the negatively charged ones. For example, in the case of tetramethylamine ( $C_4H_{12}N^+$ ), a hydrogen was subtracted to give  $C_4H_{11}N$  as neutralized formula. InChIKey skeletons should not be changed by this manipulation of hydrogens in most cases; therefore, they can be used as unique signatures for constitutional isomers regardless of their charged states (**Supplementary Results and Discussion 1.1.2 and 1.1.4**), although they might be changed in some cases such as some specific tautomers. Records with an insufficient number of hydrogens for this formula manipulation were excluded. The method of CDK and Java source codes used in the molecular calculations is shown in **Supplementary Fig. S11**. The first block (14 letters) of InChIKey (hereafter referred to as the InChIKey skeleton) was used as a unique signature for the same connectivity of atoms (Heller *et al.*, 2013). The mass values were calculated based on the exact mass values of the atoms published by IUPAC (de Laeter *et al.*, 2003). To recognise the source of the original database and if the records in the original database were charged, contained multiple components and were radicals, we attached labels comprising the signature of the database, charge, 'f' and 'r' for each compound ID. Signatures of the compound databases are as follows: KG, KEGG; KN, KNApSAcK; FL, FlavonoidViewer; HM, HMDB; LM, LIPID MAPS; UN, UNPD and PC, PubChem. Examples of the labelled IDs in HMDB are shown in **Supplementary Fig. S10**. The InChIKey skeleton, the tentatively neutralized formula and its mass value, the original IDs with labels and the shortest name among the associated compounds as representative were stored in

MariaDB (5.0.77, MariaDB Foundation) on a Red Hat Enterprise Linux Server 7.1 (the UC2 database). The web service to search the UC2 database was constructed with Apache Tomcat and implemented in MFSearcher (<http://webs2.kazusa.or.jp/mfsearcher>) (Sakurai *et al.*, 2013) running on the server. The GUI tool for searching the UC2 database was developed with JDK 1.7.

```
// The MDMolecule object was generated from MDL Mol file or SDF file
// obtained from the compound databases

MDMolecule mol;

// Addition of implicit hydrogens

AtomContainerManipulator.percieveAtomTypesAndConfigureAtoms( mol );
CDKHydrogenAdder adder = CDKHydrogenAdder.getInstance( mol.getBuilder() );
adder.addImplicitHydrogens( mol );
AtomContainerManipulator.convertImplicitToExplicitHydrogens( mol );

// Obtaining components

if( ! ConnectivityChecker.isConnected( mol ) ){
    IAtomContainerSet components = ConnectivityChecker.partitionIntoMolecules( mol );
}

// Detection of isotopes
boolean containsIsotope = false;
IsotopeFactory ifc = Isotopes.getInstance();
for( IAtom atom: mol.atoms() ){
    ifc.configure( atom );
    double massCurrentAtom = atom.getExactMass();
    double massMajorIsotope = ifc.getMajorIsotope( atom.getSymbol() ).getExactMass();
    if( massCurrentAtom != massMajorIsotope ){
        containsIsotope = true;
        break;
    }
}
}
```



```

// Kekulization

Kekulization.kekulize( mol );

// Generation of InChI, InChIKey and InChIKey skeleton

InChIGeneratorFactory f = InChIGeneratorFactory.getInstance();
InChIGenerator gen = f.getInChIGenerator( mol );

String inchi = gen.getInchi();
String inchikey = gen.getInchiKey();
String inchikeySkeleton = inchikey.substring(0,14);

// Calculation of the charge of the molecule

int charge = 0;
for(IAtom atom: mol.atoms()){
    if(atom.getFormalCharge() != 0){
        charge += atom.getFormalCharge();
    }
}

// Detection of the radicals

boolean isRadical = false;
for( ISingleElectron se: mol.singleElectrons() ){
    isRadical = true;
    break;
}

```

**Supplementary Fig. S11. The methods of CDK used for molecular calculations to construct the UC2 database.**

## 2.3. Preparation of the metabolite peak lists

### 2.3.1. Metabolites list in tomato fruits

As an example of manually curated metabolite peaks including secondary metabolites biosynthesized in plants, we used a list of 869 metabolite peaks detected and annotated in tomato fruits using LC-Fourier transform ion cyclotron (FT-ICR) MS (Iijima *et al.*, 2008). The list — provided as Supplementary Table S2 of Iijima *et al.* (2008) — included 510 metabolites that were detected in the positive mode of electron spray ionization (ESI) and 519 metabolites detected in the ESI negative mode. A set of 160 metabolites was detected in both modes, and 350 and 359 metabolites were detected only in the positive or the negative mode, respectively.

### 2.3.2. Metabolites list in human urine

As an example of a computationally calculated and not curated peak list, we chose data obtained from human urine. Lists of metabolite peaks in human urine were prepared from the raw data published by van der Hooft *et al.* (2016) as follows: The raw data analysed in ESI positive mode (Pooled\_Urine\_15\_POS.raw) and data analysed in ESI negative mode (Pooled\_Urine\_14\_NEG.raw) using LC-Orbitrap MS in the study MTBLS307 in MetaboLights (Salek *et al.*, 2013) were downloaded. The raw data were converted to mzXML files using ProteoWizard software (version 3.0.6447) (Kessner *et al.*, 2008). Detection of the metabolite peaks and estimation of the adducts were performed using an in-house version of the PowerGet software (Sakurai *et al.*, 2014) that was slightly modified for batch processing. Sets of 1,264 and 1,475 metabolite peaks were detected in the positive and negative modes, respectively.

### 2.3.3. Random mass list

To examine the effect of biological selection of the metabolites on the database search results, a random mass list in the  $m/z$  range of 100–1,500 was computationally generated using JDK 1.7. In total 6,491 and 6,379 mass values were generated to obtain exactly 1,000 mass values that showed results in database searches of the positive and negative modes, respectively.

## 2.4. Comparison of search results from the UC2 database and other compound databases

We compared the results from a search using UC2 (UC2 search) and a search in the normal way (conventional search). For both searches, the MFSearcher web service (<http://webs2.kazusa.or.jp/mfsearcher>) (Sakurai *et al.*, 2013) was used to get the search results and KEGG, KNApSAcK, FlavonoidViewer, LIPID MAPS and HMDB were selected as target databases. A protonated cation ( $[M+H]^+$ ) and a deprotonated anion ( $[M-H]^-$ )

were assumed for the searches with randomly generated masses in the positive and negative modes, respectively. The neutralized mass values based on the estimated adduct ions were used for both the conventional and the UC2 search. In the conventional search, searches with the detected  $m/z$  values were also performed for the peaks of the default adduct ion ( $[M+H]^+$  and  $[M-H]^-$  for the positive and negative modes, respectively) and the results were merged to those obtained with the neutralized mass values. A mass tolerance of 5 ppm was allowed. In-house programs supporting an automatic search for a large number of mass values with the MFSearcher and for counting and compiling the results were written in Java and Perl. The causes of unusual results in queries, namely those queries whose results were only found in either the UC2 search or the conventional search, were manually investigated.

### 3. Supplementary Tables

**Supplementary Table S1. Summary of the entries in the compound databases.** Values mentioned in the Supplementary Results and Discussion are highlighted as bold face in red.

|                              | Flavonoid Viewer <sup>a</sup> | KEGG   | LIPID MAPS   | HMDB   | KNAPSAcK | UNPD         | PubChem      |
|------------------------------|-------------------------------|--------|--------------|--------|----------|--------------|--------------|
| # Entries                    | 6,864                         | 15,864 | 40,159       | 74,263 | 50,692   | 229,004      | 91,385,223   |
| # Fragmented Entries         | 0                             | 432    | 10           | 139    | 0        | 0            | 4,416,521    |
| # Charged Entries            | 492                           | 601    | 475          | 871    | 750      | 3,547        | 2,728,406    |
| # Unique Formula Neutralized | 1,043                         | 8,470  | 7,344        | 10,067 | 13,522   | 32,629       | 2,505,657    |
| # Unique InChIKey            | 6,817                         | 15,622 | 40,124       | 74,009 | 49,660   | 228,617      | 87,022,085   |
| # Unique InChIKey Skeleton   | 6,415                         | 14,363 | 36,549       | 68,526 | 45,508   | 167,096      | 71,565,070   |
|                              | <i>Ratio to # Entries</i>     |        |              |        |          |              |              |
| Fragmented Entries           | 0.0%                          | 2.7%   | 0.0%         | 0.2%   | 0.0%     | 0.0%         | 4.8%         |
| Charged Entries              | <b>7.2%</b>                   | 3.8%   | 1.2%         | 1.2%   | 1.5%     | 1.5%         | 3.0%         |
| Unique Formula Neutralized   | <b>15.2%</b>                  | 53.4%  | <b>18.3%</b> | 13.6%  | 26.7%    | <b>14.2%</b> | <b>2.7%</b>  |
| Unique InChIKey              | 99.3%                         | 98.5%  | 99.9%        | 99.7%  | 98.0%    | 99.8%        | 95.2%        |
| Unique InChIKey Skeleton     | 93.5%                         | 90.5%  | 91.0%        | 92.3%  | 89.8%    | <b>73.0%</b> | <b>78.3%</b> |

<sup>a</sup> Flavonoid database at metabolomics.jp (<http://metabolomics.jp/wiki/Category:FL>)

**Supplementary Table S2. Ratio of the charged entries whose uncharged counterpart with the same connectivity is registered in the same database.** Values mentioned in the Supplementary Results and Discussion are shown as bold face in red.

|                 | # Charged entry | # Uncharged entries that have the same connectivity as the charged entry |             |
|-----------------|-----------------|--------------------------------------------------------------------------|-------------|
| FlavonoidViewer | 492             | 0                                                                        | <b>(0%)</b> |
| KEGG            | 601             | 86                                                                       | (14%)       |
| LIPID MAPS      | 475             | 8                                                                        | <b>(2%)</b> |
| HMDB            | 871             | 156                                                                      | (18%)       |
| KNAPSAcK        | 750             | 7                                                                        | <b>(1%)</b> |
| UNPD            | 3,547           | 508                                                                      | (14%)       |
| PubChem         | 2,728,406       | 938,084                                                                  | (34%)       |

**Supplementary Table S3. Summary of the shared unique connectivities (InChIKey skeletons) in the databases. Parentheses show the ratio to the number of unique InChIKey Skeletons in the database. Values mentioned in the Supplementary Results and Discussion are shown as bold face in red.**

|                                    | # in the database | # Found in other databases    |                    |                    |                    |                     |              |                                  |                  |                    |                     |  |  |  |  |  |  |  |  |  |
|------------------------------------|-------------------|-------------------------------|--------------------|--------------------|--------------------|---------------------|--------------|----------------------------------|------------------|--------------------|---------------------|--|--|--|--|--|--|--|--|--|
|                                    |                   | Flavonoid Viewer <sup>a</sup> | KEGG               | LIPID MAPS         | HMDB               | KNAPsAcK            | UNPD         | PubChem                          | All <sup>b</sup> | All-P <sup>b</sup> | All-PU <sup>b</sup> |  |  |  |  |  |  |  |  |  |
| <b>Unique InChIKey Skeleton</b>    |                   |                               |                    |                    |                    |                     |              |                                  |                  |                    |                     |  |  |  |  |  |  |  |  |  |
| <b>FlavonoidViewer<sup>a</sup></b> | 6,415             | -                             | 495 (8%)           | <b>6,104 (95%)</b> | 1,013 (16%)        | <b>6,390 (100%)</b> | 5,626 (88%)  | <b>6,414 (100%)</b>              | 6,413 (100%)     | 6,406 (100%)       |                     |  |  |  |  |  |  |  |  |  |
| <b>KEGG</b>                        | 14,363            | 495 (3%)                      | -                  | <b>2,400 (17%)</b> | <b>4,661 (32%)</b> | <b>4,920 (34%)</b>  | 6,768 (47%)  | 14,192 (99%)                     | 9,364 (65%)      | 8,183 (57%)        |                     |  |  |  |  |  |  |  |  |  |
| <b>LIPID MAPS</b>                  | 36,549            | 6,104 (17%)                   | <b>2,400 (7%)</b>  | -                  | <b>8,155 (22%)</b> | <b>7,395 (20%)</b>  | 9,175 (25%)  | 36,544 (100%)                    | 15,958 (44%)     | 14,380 (39%)       |                     |  |  |  |  |  |  |  |  |  |
| <b>HMDB</b>                        | 68,526            | 1,013 (1%)                    | <b>4,661 (7%)</b>  | -                  | -                  | <b>5,002 (7%)</b>   | 10,663 (16%) | <b>25,362 (37%)</b>              | 18,131 (26%)     | 13,655 (20%)       |                     |  |  |  |  |  |  |  |  |  |
| <b>KNAPsAcK</b>                    | 45,508            | 6,390 (14%)                   | <b>4,920 (11%)</b> | <b>8,155 (16%)</b> | <b>5,002 (11%)</b> | -                   | 39,660 (87%) | <b>43,585 (96%)</b>              | 41,003 (90%)     | 13,407 (29%)       |                     |  |  |  |  |  |  |  |  |  |
| <b>UNPD</b>                        | 167,096           | 5,626 (3%)                    | 6,768 (4%)         | 9,175 (5%)         | 10,663 (6%)        | 39,660 (24%)        | -            | 128,800 (77%)                    | 48,606 (29%)     | -                  |                     |  |  |  |  |  |  |  |  |  |
| <b>PubChem</b>                     | 71,565,070        | 6,325 (0%)                    | 14,082 (0%)        | 36,522 (0%)        | 24,665 (0%)        | 40,681 (0%)         | 125,419 (0%) | 169,346 (0%)                     | 256,379          | 137,889            |                     |  |  |  |  |  |  |  |  |  |
|                                    |                   |                               |                    |                    |                    |                     |              | # Total unique InChIKey Skeleton |                  |                    |                     |  |  |  |  |  |  |  |  |  |
|                                    |                   |                               |                    |                    |                    |                     |              | 71,652,103                       |                  |                    |                     |  |  |  |  |  |  |  |  |  |

<sup>a</sup> Flavonoid database at metabolomics.jp (<http://metabolomics.jp/wiki/Category:FL>)

<sup>b</sup> Number of unique InChIKey skeletons found in one of the other databases (All), all other databases except PubChem (All-P), and all other databases except PubChem and UNPD (All-PU).

Supplementary Table S4. Summary of the database search results with conventional search and UC2 search. Values mentioned in the Results and Discussion are shown as bold face in red.

| Label                                                                                                                 | Tomato <sup>a</sup> |     |     |          |       |      | Urine    |       |       |          |       |       | Tomato <sup>a</sup> |       |       |          |       |       | Urine    |       |       |          |       |       | Random   |       |       |               |  |  | Calculation |
|-----------------------------------------------------------------------------------------------------------------------|---------------------|-----|-----|----------|-------|------|----------|-------|-------|----------|-------|-------|---------------------|-------|-------|----------|-------|-------|----------|-------|-------|----------|-------|-------|----------|-------|-------|---------------|--|--|-------------|
|                                                                                                                       | Positive            |     |     | Negative |       |      | Positive |       |       | Negative |       |       | Positive            |       |       | Negative |       |       | Positive |       |       | Negative |       |       | Positive |       |       | Negative      |  |  |             |
|                                                                                                                       | Number of queries   |     |     |          |       |      |          |       |       |          |       |       | Ratio <sup>b</sup>  |       |       |          |       |       |          |       |       |          |       |       |          |       |       |               |  |  |             |
| # total queries                                                                                                       | A                   | 510 | 359 | 1284     | 1475  | 6491 | 6379     | 100%  | 100%  | 100%     | 100%  | 100%  | 100%                | 100%  | 100%  | 100%     | 100%  | 100%  | 100%     | 100%  | 100%  | 100%     | 100%  | 100%  | 100%     | 100%  | 100%  | A/A           |  |  |             |
| # queries whose results were found in conventional search or UC2 search                                               | B                   | 277 | 167 | 967      | 1092  | 1000 | 1000     | 54%   | 47%   | 77%      | 74%   | 15%   | 16%                 | 15%   | 15%   | 15%      | 15%   | 15%   | 15%      | 15%   | 15%   | 15%      | 15%   | 15%   | 15%      | 15%   | 15%   | B/A           |  |  |             |
| # queries whose results were found in...<br>conventional search                                                       | C                   | 277 | 164 | 967      | 1091  | 988  | 984      | 54%   | 46%   | 77%      | 74%   | 15%   | 15%                 | 15%   | 15%   | 15%      | 15%   | 15%   | 15%      | 15%   | 15%   | 15%      | 15%   | 15%   | 15%      | 15%   | C/A   |               |  |  |             |
| 1) with the neutralized mass values <sup>c</sup>                                                                      | C1                  | 226 | 138 | 903      | 1022  | 564  | 562      | 82%   | 84%   | 93%      | 94%   | 57%   | 56%                 | 57%   | 57%   | 57%      | 57%   | 57%   | 57%      | 57%   | 57%   | 57%      | 57%   | 57%   | 57%      | 57%   | C1/C  |               |  |  |             |
| 2) with the detected or the randomly generated m/z values <sup>d</sup>                                                | C2                  | 134 | 57  | 182      | 230   | 563  | 539      | 48%   | 35%   | 19%      | 21%   | 56%   | 55%                 | 56%   | 56%   | 56%      | 56%   | 56%   | 56%      | 56%   | 56%   | 56%      | 56%   | 56%   | 56%      | 56%   | C2/C  |               |  |  |             |
| UC2 search                                                                                                            | D                   | 220 | 139 | 906      | 1012  | 553  | 553      | 43%   | 39%   | 72%      | 69%   | 9%    | 9%                  | 9%    | 9%    | 9%       | 9%    | 9%    | 9%       | 9%    | 9%    | 9%       | 9%    | 9%    | 9%       | 9%    | D/A   |               |  |  |             |
| # queries with a smaller number of results given in...<br>conventional search and UC2 search                          | E                   | 220 | 136 | 906      | 1011  | 554  | 537      | 43%   | 38%   | 72%      | 69%   | 9%    | 8%                  | 9%    | 9%    | 9%       | 9%    | 9%    | 9%       | 9%    | 9%    | 9%       | 9%    | 9%    | 9%       | 9%    | E/A   |               |  |  |             |
| conventional search                                                                                                   | F                   | 0   | 3   | 8        | 4     | 2    | 1        | 0%    | 2%    | 1%       | 0%    | 0%    | 0%                  | 0%    | 0%    | 0%       | 0%    | 0%    | 0%       | 0%    | 0%    | 0%       | 0%    | 0%    | 0%       | 0%    | F/C   |               |  |  |             |
| UC2 search                                                                                                            | G                   | 160 | 93  | 684      | 816   | 279  | 227      | 73%   | 67%   | 75%      | 81%   | 50%   | 41%                 | 50%   | 50%   | 50%      | 50%   | 50%   | 50%      | 50%   | 50%   | 50%      | 50%   | 50%   | 50%      | 50%   | G/D   |               |  |  |             |
| # queries with unique results that were found in...<br>conventional search                                            | H                   | 63  | 38  | 119      | 118   | 332  | 376      | 23%   | 23%   | 12%      | 11%   | 33%   | 38%                 | 33%   | 33%   | 33%      | 33%   | 33%   | 33%      | 33%   | 33%   | 33%      | 33%   | 33%   | 33%      | 33%   | H/C   |               |  |  |             |
| UC2 search                                                                                                            | I                   | 74  | 42  | 163      | 177   | 276  | 292      | 12%   | 11%   | 9%       | 8%    | 12%   | 11%                 | 12%   | 12%   | 12%      | 12%   | 12%   | 12%      | 12%   | 12%   | 12%      | 12%   | 12%   | 12%      | 12%   | I/A   |               |  |  |             |
| # queries in UC2 search results that contained...<br>modified entries (charged, fragmented, or radical)<br>charged    | J                   | 49  | 25  | 146      | 224   | 31   | 27       | 22%   | 18%   | 16%      | 22%   | 6%    | 5%                  | 6%    | 6%    | 6%       | 6%    | 6%    | 6%       | 6%    | 6%    | 6%       | 6%    | 6%    | 6%       | 6%    | J/D   |               |  |  |             |
| only charged entries were hit in the same database                                                                    | J1                  | 46  | 23  | 127      | 206   | 27   | 25       | 21%   | 17%   | 14%      | 20%   | 5%    | 5%                  | 5%    | 5%    | 5%       | 5%    | 5%    | 5%       | 5%    | 5%    | 5%       | 5%    | 5%    | 5%       | 5%    | J1/D  |               |  |  |             |
| fragmented                                                                                                            | J2                  | 43  | 20  | 60       | 29    | 25   | 25       | 93%   | 87%   | 47%      | 14%   | 93%   | 100%                | 93%   | 93%   | 93%      | 93%   | 93%   | 93%      | 93%   | 93%   | 93%      | 93%   | 93%   | 93%      | 93%   | J2/J1 |               |  |  |             |
| radical                                                                                                               | J3                  | 6   | 7   | 36       | 152   | 5    | 5        | 3%    | 5%    | 4%       | 15%   | 1%    | 1%                  | 1%    | 1%    | 1%       | 1%    | 1%    | 1%       | 1%    | 1%    | 1%       | 1%    | 1%    | 1%       | 1%    | J3/D  |               |  |  |             |
| J4                                                                                                                    | 0                   | 0   | 0   | 2        | 0     | 0    | 0        | 0%    | 0%    | 0%       | 0%    | 0%    | 0%                  | 0%    | 0%    | 0%       | 0%    | 0%    | 0%       | 0%    | 0%    | 0%       | 0%    | 0%    | 0%       | 0%    | J4/D  |               |  |  |             |
| # queries whose results were found only in conventional search...<br>1) with the neutralized mass values <sup>c</sup> | K                   | 57  | 28  | 61       | 80    | 444  | 447      | 20.6% | 16.8% | 6.3%     | 7.3%  | 44.4% | 44.7%               | 44.4% | 44.4% | 44.4%    | 44.4% | 44.4% | 44.4%    | 44.4% | 44.4% | 44.4%    | 44.4% | 44.4% | 44.4%    | 44.4% | K/B   |               |  |  |             |
| false positives matched to the charged entries                                                                        | L                   | 7   | 2   | 3        | 13    | 20   | 16       | 12.3% | 7.1%  | 4.9%     | 16.3% | 4.5%  | 3.6%                | 4.5%  | 4.5%  | 4.5%     | 4.5%  | 4.5%  | 4.5%     | 4.5%  | 4.5%  | 4.5%     | 4.5%  | 4.5%  | 4.5%     | 4.5%  | L/K   |               |  |  |             |
| false positives matched to the fragmented entries                                                                     | L1                  | 7   | 2   | 3        | 13    | 19   | 16       | 100%  | 100%  | 100%     | 100%  | 100%  | 100%                | 100%  | 100%  | 100%     | 100%  | 100%  | 100%     | 100%  | 100%  | 100%     | 100%  | 100%  | 100%     | 100%  | L1/L  |               |  |  |             |
| false positives matched to the modified entries                                                                       | L2                  | 0   | 0   | 1        | 1     | 2    | 0        | 0%    | 0%    | 33%      | 8%    | 10%   | 0%                  | 0%    | 10%   | 10%      | 10%   | 10%   | 10%      | 10%   | 10%   | 10%      | 10%   | 10%   | 10%      | 10%   | L2/L  |               |  |  |             |
| 2) with the detected or the randomly generated m/z values <sup>d</sup>                                                | M                   | 51  | 27  | 58       | 78    | 431  | 441      | 89%   | 96%   | 95%      | 98%   | 97%   | 99%                 | 97%   | 97%   | 97%      | 97%   | 97%   | 97%      | 97%   | 97%   | 97%      | 97%   | 97%   | 97%      | 97%   | M/K   |               |  |  |             |
| false positives matched to the uncharged entries                                                                      | M1                  | 51  | 21  | 58       | 77    | 427  | 428      | 100%  | 78%   | 100%     | 99%   | 99%   | 97%                 | 97%   | 97%   | 97%      | 97%   | 97%   | 97%      | 97%   | 97%   | 97%      | 97%   | 97%   | 97%      | 97%   | M1/M  |               |  |  |             |
| false positives matched to the fragmented entries                                                                     | M2                  | 0   | 1   | 1        | 1     | 1    | 3        | 0%    | 4%    | 2%       | 1%    | 0%    | 1%                  | 0%    | 1%    | 1%       | 1%    | 1%    | 1%       | 1%    | 1%    | 1%       | 1%    | 1%    | 1%       | 1%    | M2/M  |               |  |  |             |
| false positives matched to records of inappropriate charge <sup>e</sup>                                               | M3                  | 0   | 7   | 3        | 1     | 4    | 13       | 0%    | 26%   | 5%       | 1%    | 3%    | 3%                  | 3%    | 3%    | 3%       | 3%    | 3%    | 3%       | 3%    | 3%    | 3%       | 3%    | 3%    | 3%       | 3%    | M3/M  |               |  |  |             |
| # queries whose results were found only in UC2 search                                                                 | N                   | 0   | 3   | 0        | 1     | 2    | 16       | 0.0%  | 1.8%  | 0.0%     | 0.1%  | 0.2%  | 1.6%                | 1.6%  | 1.6%  | 1.6%     | 1.6%  | 1.6%  | 1.6%     | 1.6%  | 1.6%  | 1.6%     | 1.6%  | 1.6%  | 1.6%     | 1.6%  | N/B   |               |  |  |             |
| true positives matched to the modified entries                                                                        | N1                  | 0   | 3   | 0        | 1     | 1    | 14       | -     | 100%  | -        | 100%  | 50%   | 88%                 | 50%   | 50%   | 50%      | 50%   | 50%   | 50%      | 50%   | 50%   | 50%      | 50%   | 50%   | 50%      | 50%   | N1/N  |               |  |  |             |
| false positives caused by miss registration in the database                                                           | N2                  | 0   | 0   | 0        | 0     | 0    | 1        | -     | 0%    | -        | 0%    | 0%    | 6%                  | 0%    | 0%    | 0%       | 0%    | 0%    | 0%       | 0%    | 0%    | 0%       | 0%    | 0%    | 0%       | 0%    | N2/N  |               |  |  |             |
| false positives matched to records with repeat structure <sup>f</sup>                                                 | N3                  | 0   | 0   | 0        | 0     | 1    | 1        | -     | 0%    | -        | 0%    | 50%   | 6%                  | 0%    | 0%    | 0%       | 0%    | 0%    | 0%       | 0%    | 0%    | 0%       | 0%    | 0%    | 0%       | 0%    | N3/N  |               |  |  |             |
| # queries where results excluding apparent false positives were found in...<br>conventional search                    | O                   | 220 | 136 | 906      | 1,011 | 554  | 537      | 554   | 554   | 554      | 554   | 554   | 554                 | 554   | 554   | 554      | 554   | 554   | 554      | 554   | 554   | 554      | 554   | 554   | 554      | 554   | O - K |               |  |  |             |
| UC2 search                                                                                                            | P                   | 220 | 139 | 906      | 1,012 | 555  | 551      | 555   | 555   | 555      | 555   | 555   | 555                 | 555   | 555   | 555      | 555   | 555   | 555      | 555   | 555   | 555      | 555   | 555   | 555      | 555   | 555   | P - (N2 + N3) |  |  |             |

<sup>a</sup> Metabolites (160 peaks) detected in both positive and negative modes are shown as the positive.

<sup>b</sup> The ratios were calculated by division of the values given in the column 'Calculation' where values shown in the column 'Label' were used.

<sup>c</sup> [M+H]<sup>+</sup> and [M-H]<sup>-</sup> were used for the search with randomly generated mass values.

<sup>d</sup> The search was performed when the estimated adduct contained proton(s) as sole charged moiety.

<sup>e</sup> Inappropriate polarity or valence.

<sup>f</sup> Chemical structure with repeat units (e.g., CO2072 in KEGG database) whose mol file is written as unrepeated structure.

## 4. Other Supplementary Figures

### Tomato fruits

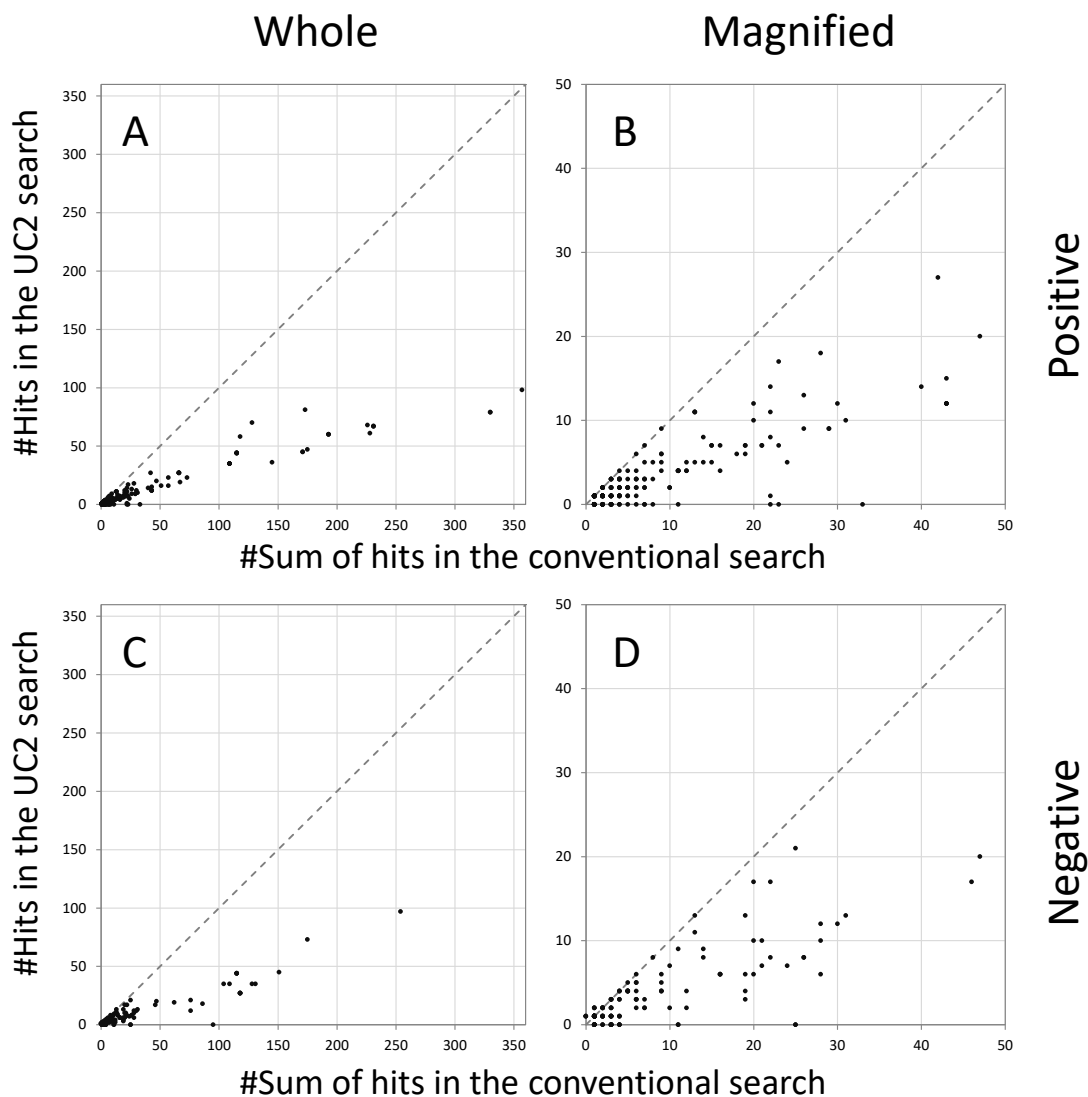

**Supplementary Fig. S12. Comparison of the number of hits in the conventional search and the UC2 search for metabolites in tomato fruits.** The number of compound hits in conventional search and in the UC2 search using the databases (KEGG, KNApSACk, FlavonoidViewer, HMDB and LIPID MAPS) is plotted. The sum of search results with neutralized mass value and detected  $m/z$  value was used in the results of the conventional search. The mass values of the metabolite peaks detected in tomato fruits in positive (A and B) and negative (C and D) modes were searched with 5 ppm mass tolerance. B and D are magnified views of A and C, respectively. Dots were drawn with 10% opacity.

## Human urine

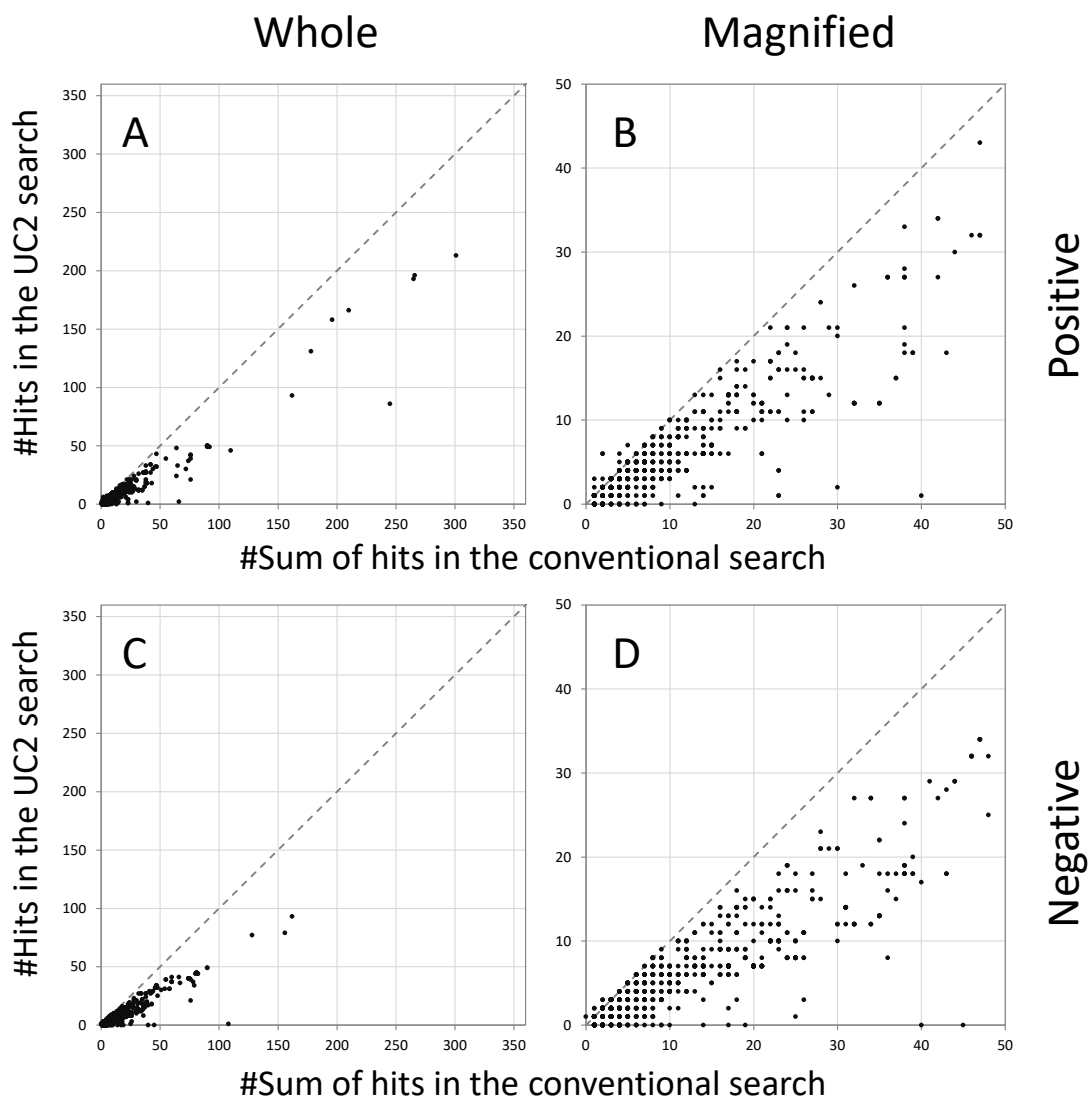

**Supplementary Fig. S13. Comparison of the number of hits in the conventional search and the UC2 search for metabolites in human urine.** The number of compound hits in the conventional search and in the UC2 search using the databases (KEGG, KNApSAcK, FlavonoidViewer, HMDB and LIPID MAPS) is plotted. The sum of search results with neutralized mass value and detected  $m/z$  value was used in the results of the conventional search. The mass values of the metabolite peaks detected in human urine in positive (A and B) and negative (C and D) modes were searched with 5 ppm mass tolerance. B and D are magnified views of A and C, respectively. Dots were drawn with 10% opacity.



## Randomly generated mass values

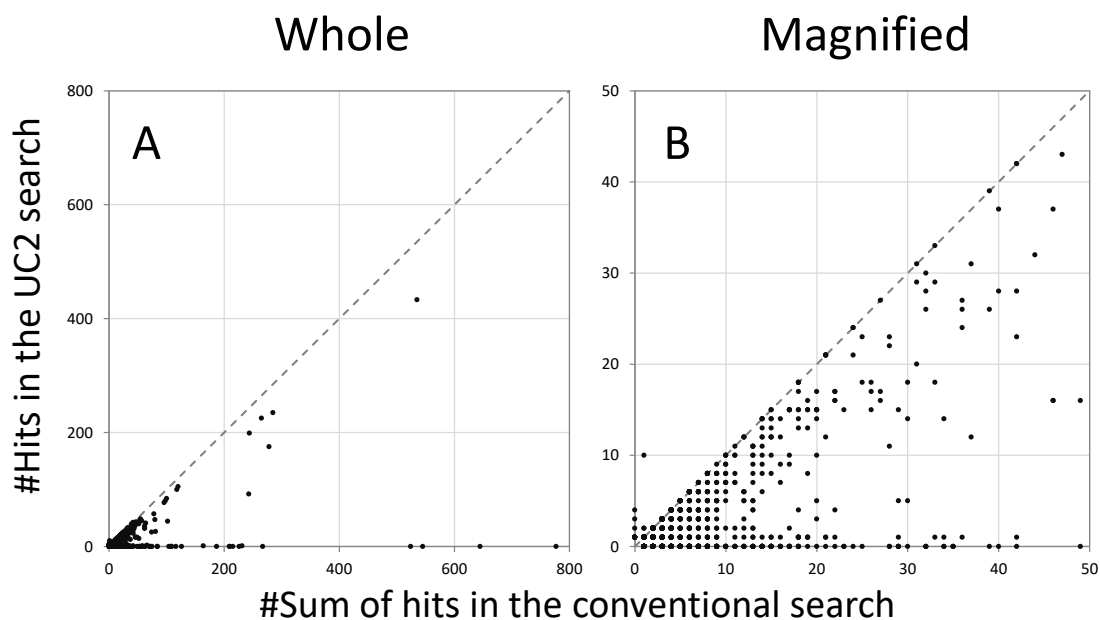

**Supplementary Fig. S14. Comparison of the number of hits in the conventional search and the UC2 search for randomly generated mass values.** The number of compound hits in the conventional search and in the UC2 search using the databases (KEGG, KNApSAcK, FlavonoidViewer, HMDB and LIPID MAPS) is plotted. A protonated cation ( $[M+H]^+$ ) and a deprotonated anion ( $[M-H]^-$ ) were assumed for neutralized mass values in the positive and negative modes, respectively. The sum of search results with neutralized mass value and generated mass value was used in the results of the conventional search. A mass tolerance of 5 ppm was allowed. B is a magnified view of A. Dots were drawn with 10% opacity.

## References

- Afendi, F.M. *et al.* (2012) KNApSAcK family databases: integrated metabolite-plant species databases for multifaceted plant research, *Plant Cell Physiol.*, **53**, e1.
- de Laeter, J.R. *et al.* (2003) Atomic weights of the elements: Review 2000 (IUPAC Technical Report), *Pure Appl. Chem.*, **75**, 683-800.
- Fahy, E. *et al.* (2009) Update of the LIPID MAPS comprehensive classification system for lipids, *J. Lipid Res.*, **50 Suppl**, S9-14.
- Gu, J. *et al.* (2013) Use of natural products as chemical library for drug discovery and network pharmacology, *PLoS One*, **8**, e62839.
- Heller, S. *et al.* (2013) InChI - the worldwide chemical structure identifier standard, *J. Cheminf.*, **5**, 1-9.
- Iijima, Y. *et al.* (2008) Metabolite annotations based on the integration of mass spectral information, *Plant J.*, **54**, 949-962.
- Kanehisa, M. *et al.* (2016) KEGG as a reference resource for gene and protein annotation, *Nucleic Acids Res.*, **44**, D457-462.
- Kessner, D. *et al.* (2008) ProteoWizard: open source software for rapid proteomics tools development, *Bioinformatics*, **24**, 2534-2536.
- Sakurai, N. *et al.* (2014) Tools and databases of the KOMICS web portal for preprocessing, mining, and dissemination of metabolomics data, *BioMed Res. Int.*, **2014**, 1-11.
- Sakurai, N. *et al.* (2013) An application of a relational database system for high-throughput prediction of elemental compositions from accurate mass values, *Bioinformatics*, **29**, 290-291.
- Salek, R.M. *et al.* (2013) The MetaboLights repository: curation challenges in metabolomics, *Database: the journal of biological databases and curation*, **2013**, bat029.
- van der Hooft, J.J.J. *et al.* (2016) Urinary antihypertensive drug metabolite screening using molecular networking coupled to high-resolution mass spectrometry fragmentation, *Metabolomics*, **12**, 125.
- Wang, Y. *et al.* (2009) PubChem: a public information system for analyzing bioactivities of small molecules, *Nucleic Acids Res.*, **37**, W623-633.
- Willighagen, E.L. *et al.* (2017) The Chemistry Development Kit (CDK) v2.0: atom typing, depiction, molecular formulas, and substructure searching, *J. Cheminf.*, **9**.
- Wishart, D.S. *et al.* (2013) HMDB 3.0—The Human Metabolome Database in 2013, *Nucleic Acids Res.*, **41**, D801-807.
